# Supplementary material for: Can solvated intermediates inform us about nucleation pathways? The case of β-pABA
Source: Royal Society of Chemistry journal article supplement (doi:10.1039/d0ce00970a), 2020-01-01
Supplement: d0ce00970a1.pdf [file d0ce00970a1.pdf]

## Supplementary Information

### Can solvated intermediates inform us about nucleation pathways? The case of $\beta$ -*p*ABA

A. J. Cruz-Cabeza, E. Taylor, I. J. Sugden, D. H. Bowskill, S. E. Wright, H. Abdullahi, D. Tulegenov, G. Sadiq, R. J. Davey

#### 1 Crystallographic Data

| Solvate                                                     | <i>p</i> ABA solvates                                                                  |                                                                                                     | <i>p</i> F- <i>p</i> ABA solvates                                                                  |                                                                                                                     |
|-------------------------------------------------------------|----------------------------------------------------------------------------------------|-----------------------------------------------------------------------------------------------------|----------------------------------------------------------------------------------------------------|---------------------------------------------------------------------------------------------------------------------|
|                                                             | Acetone                                                                                | Dioxane                                                                                             | Acetone                                                                                            | Dioxane                                                                                                             |
| Stoichiometry                                               | 1:1                                                                                    | 1:1                                                                                                 | 1:1                                                                                                | 1:1                                                                                                                 |
| CCDC Deposition No.                                         | 2009903                                                                                | 2009898                                                                                             | 2009893                                                                                            | 2009900                                                                                                             |
| Chemical Formula                                            | 2(C <sub>7</sub> H <sub>7</sub> N O <sub>2</sub> ),<br>C <sub>3</sub> H <sub>6</sub> O | 2(C <sub>7</sub> H <sub>7</sub> N O <sub>2</sub> ),<br>C <sub>4</sub> H <sub>8</sub> O <sub>2</sub> | C <sub>7</sub> H <sub>3</sub> F <sub>4</sub> N O <sub>2</sub> ,<br>C <sub>3</sub> H <sub>6</sub> O | C <sub>7</sub> H <sub>3</sub> F <sub>4</sub> H O <sub>2</sub> ,<br>2(C <sub>4</sub> H <sub>8</sub> O <sub>2</sub> ) |
| Mr                                                          | 332.35                                                                                 | 362.37                                                                                              | 267.18                                                                                             | 385.31                                                                                                              |
| Crystal System                                              | triclinic                                                                              | monoclinic                                                                                          | monoclinic                                                                                         | monoclinic                                                                                                          |
| Space Group                                                 | P-1                                                                                    | P2 <sub>1</sub> /c                                                                                  | I2/m                                                                                               | P2 <sub>1</sub> /c                                                                                                  |
| a (Å)                                                       | 5.0395(2)                                                                              | 22.4397(9)                                                                                          | 6.5218(10)                                                                                         | 7.0886(2)                                                                                                           |
| b (Å)                                                       | 8.2374(3)                                                                              | 20.5326(7)                                                                                          | 17.636(2)                                                                                          | 18.8246(5)                                                                                                          |
| c (Å)                                                       | 20.4205(7)                                                                             | 11.9083(4)                                                                                          | 10.0639(14)                                                                                        | 12.8623(4)                                                                                                          |
| $\alpha$ (°)                                                | 88.805(2)                                                                              | 90                                                                                                  | 90                                                                                                 | 90                                                                                                                  |
| $\beta$ (°)                                                 | 83.313(2)                                                                              | 105.194(3)                                                                                          | 107.754(14)                                                                                        | 92.882(2)                                                                                                           |
| $\gamma$ (°)                                                | 84.487(2)                                                                              | 90                                                                                                  | 90                                                                                                 | 90                                                                                                                  |
| Volume (Å <sup>3</sup> )                                    | 838.00(5)                                                                              | 5294.9(3)                                                                                           | 1102.4(3)                                                                                          | 1714.18(9)                                                                                                          |
| Z                                                           | 2                                                                                      | 12                                                                                                  | 4                                                                                                  | 4                                                                                                                   |
| Density (g/cm <sup>3</sup> )                                | 1.317                                                                                  | 1.364                                                                                               | 1.61                                                                                               | 1.493                                                                                                               |
| Absorption Coefficient $\mu$ (mm <sup>-1</sup> )            | 0.813                                                                                  | 0.862                                                                                               | 0.161                                                                                              | 1.248                                                                                                               |
| $\theta_{\min}, \theta_{\max}$                              | 6.55, 72.23                                                                            | 4.31, 71.91                                                                                         | 4.042, 27.905                                                                                      | 4.17, 71.73                                                                                                         |
| Theta max                                                   | 72.23                                                                                  | 71.91                                                                                               | 27.905                                                                                             | 71.73                                                                                                               |
| Temperature (K)                                             | 150(2)                                                                                 | 150(2)                                                                                              | 150.02(10)                                                                                         | 150(2)                                                                                                              |
| Measured Reflections                                        | 8371                                                                                   | 10342                                                                                               | 3925                                                                                               | 13651                                                                                                               |
| Independent Reflections                                     | 3161                                                                                   | 10342                                                                                               | 1363                                                                                               | 3275                                                                                                                |
| Observed Reflections [ $I > 2\sigma(I)$ ]                   | 2878                                                                                   | 6217                                                                                                | 978                                                                                                | 2790                                                                                                                |
| Parameters                                                  | 237                                                                                    | 722                                                                                                 | 98                                                                                                 | 244                                                                                                                 |
| Tmin, Tmax                                                  | 0.859, 0.938                                                                           | 0.777, 0.942                                                                                        | 0.739, 1.000                                                                                       | 0.761, 0.855                                                                                                        |
| $R[F^2 > 2\sigma(F^2)]$                                     | 0.0381                                                                                 | 0.0801                                                                                              | 0.0672                                                                                             | 0.0306                                                                                                              |
| $wR(F^2)$                                                   | 0.1114                                                                                 | 0.2386                                                                                              | 0.203                                                                                              | 0.0811                                                                                                              |
| Goof                                                        | 1.067                                                                                  | 1.04                                                                                                | 1.103                                                                                              | 1.021                                                                                                               |
| $\Delta\rho_{\max}, \Delta\rho_{\min}$ (e Å <sup>-3</sup> ) | 0.227, -0.285                                                                          | 0.625, -0.319                                                                                       | 0.873, -0.44                                                                                       | 0.225, -0.204                                                                                                       |

| Compound                                                   | pABA derivatives                                 |                                                               |                                                   |                                                |                                                |                                                |                                                |                                                   |                                                    |
|------------------------------------------------------------|--------------------------------------------------|---------------------------------------------------------------|---------------------------------------------------|------------------------------------------------|------------------------------------------------|------------------------------------------------|------------------------------------------------|---------------------------------------------------|----------------------------------------------------|
|                                                            | 2-F-pABA                                         | pF-pABA                                                       | 3-Cl-pABA                                         | 2-Me-pABA                                      | 3-Me-pABA                                      | 3-OH-pABA                                      | 2-OMe-pABA                                     | 2-OMe-5-Cl-pABA                                   | 2-OEt-5-Cl-pABA                                    |
| CCDC Deposition No.                                        | 2009895                                          | 2009899                                                       | 2009894                                           | 2009902                                        | 2009901                                        | 2009891                                        | 2009892                                        | 2009897                                           | 2009896                                            |
| Chemical Formula                                           | C <sub>7</sub> H <sub>6</sub> F N O <sub>2</sub> | C <sub>7</sub> H <sub>3</sub> F <sub>4</sub> N O <sub>2</sub> | C <sub>7</sub> H <sub>6</sub> Cl N O <sub>2</sub> | C <sub>8</sub> H <sub>9</sub> N O <sub>2</sub> | C <sub>8</sub> H <sub>9</sub> N O <sub>2</sub> | C <sub>7</sub> H <sub>7</sub> N O <sub>3</sub> | C <sub>8</sub> H <sub>9</sub> N O <sub>3</sub> | C <sub>8</sub> H <sub>8</sub> Cl N O <sub>3</sub> | C <sub>9</sub> H <sub>10</sub> Cl N O <sub>3</sub> |
| Mr                                                         | 155.13                                           | 209.1                                                         | 171.58                                            | 151.16                                         | 302.32                                         | 153.14                                         | 167.16                                         | 201.6                                             | 215.63                                             |
| Crystal System                                             | monoclinic                                       | monoclinic                                                    | monoclinic                                        | orthorhombic                                   | monoclinic                                     | orthorhombic                                   | monoclinic                                     | triclinic                                         | monoclinic                                         |
| Space Group                                                | C2/c                                             | P2 <sub>1</sub> /n                                            | P2 <sub>1</sub> /c                                | P2 <sub>1</sub> 2 <sub>1</sub> 2 <sub>1</sub>  | P2 <sub>1</sub> /c                             | Pbca                                           | P2 <sub>1</sub> /c                             | P-1                                               | P2 <sub>1</sub> /c                                 |
| a (Å)                                                      | 14.7711(8)                                       | 4.1957(2)                                                     | 3.7229(3)                                         | 7.74940(14)                                    | 10.7033(4)                                     | 11.6926(9)                                     | 8.1846(7)                                      | 7.2780(6)                                         | 9.7014(12)                                         |
| b (Å)                                                      | 3.7877(2)                                        | 14.9867(6)                                                    | 11.1634(8)                                        | 8.12614(16)                                    | 8.7280(3)                                      | 8.1121(7)                                      | 13.5952(10)                                    | 7.5330(7)                                         | 14.9141(12)                                        |
| c (Å)                                                      | 24.3334(12)                                      | 11.5145(5)                                                    | 16.9454(11)                                       | 22.7285(4)                                     | 16.1405(7)                                     | 14.1796(10)                                    | 7.2087(6)                                      | 16.2004(11)                                       | 6.9582(9)                                          |
| α (°)                                                      | 90                                               | 90                                                            | 90                                                | 90                                             | 90                                             | 90                                             | 90                                             | 94.713(6)                                         | 90                                                 |
| β (°)                                                      | 107.378(4)                                       | 97.566(4)                                                     | 95.218(7)                                         | 90                                             | 95.802(4)                                      | 90                                             | 109.909(10)                                    | 91.340(6)                                         | 109.984(14)                                        |
| γ (°)                                                      | 90                                               | 90                                                            | 90                                                | 90                                             | 90                                             | 90                                             | 90                                             | 106.926(7)                                        | 90                                                 |
| Volume (Å <sup>3</sup> )                                   | 1299.28(12)                                      | 717.73(6)                                                     | 701.34(8)                                         | 1431.28(5)                                     | 1500.10(10)                                    | 1344.95(17)                                    | 754.18(11)                                     | 845.80(12)                                        | 946.1(2)                                           |
| Z                                                          | 8                                                | 4                                                             | 4                                                 | 8                                              | 4                                              | 8                                              | 4                                              | 4                                                 | 4                                                  |
| Density (g/cm <sup>3</sup> )                               | 1.586                                            | 1.935                                                         | 1.625                                             | 1.403                                          | 1.339                                          | 1.513                                          | 1.472                                          | 1.583                                             | 1.514                                              |
| Absorption Coefficient μ (mm <sup>-1</sup> )               | 0.136                                            | 0.208                                                         | 0.483                                             | 0.842                                          | 0.097                                          | 0.12                                           | 0.114                                          | 0.422                                             | 0.383                                              |
| θ <sub>min</sub> , θ <sub>max</sub>                        | 2.873, 28.686                                    | 2.239,                                                        | 4.067                                             | 6.018                                          | 1.882                                          | 4.159                                          | 3.981                                          | 3.935                                             | 4.136                                              |
| Theta max                                                  | 28.686                                           | 26.307                                                        | 28.522                                            | 76.525                                         | 27.739                                         | 28.971                                         | 27.109                                         | 28.06                                             | 26.216                                             |
| Temperature (K)                                            | 150.00(10)                                       | 100.12(10)                                                    | 150                                               | 150.00(10)                                     | 150.01(10)                                     | 150                                            | 150                                            | 150                                               | 150                                                |
| Measured Reflections                                       | 7607                                             | 8394                                                          | 5117                                              | 6832                                           | 18127                                          | 6923                                           | 5879                                           | 7197                                              | 4839                                               |
| Independent Reflections                                    | 1554                                             | 1458                                                          | 1728                                              | 2901                                           | 3603                                           | 1669                                           | 1877                                           | 3951                                              | 2250                                               |
| Observed Reflections [I > 2σ(I)]                           | 1386                                             | 1306                                                          | 1342                                              | 2813                                           | 2552                                           | 1150                                           | 1219                                           | 2562                                              | 1420                                               |
| Parameters                                                 | 100                                              | 139                                                           | 102                                               | 271                                            | 201                                            | 103                                            | 111                                            | 243                                               | 129                                                |
| Tmin, Tmax                                                 | 0.64803, 1                                       | 0.3095, 1                                                     | 0.35418, 1                                        | 0.87873, 1                                     | 0.40453, 1                                     | 0.84492, 1                                     | 0.79079, 1                                     | 0.84804, 1                                        | 0.91675, 1                                         |
| R[F <sup>2</sup> > 2σ(F <sup>2</sup> )]                    | 0.0366                                           | 0.0297                                                        | 0.0427                                            | 0.0277                                         | 0.0506                                         | 0.0495                                         | 0.0532                                         | 0.0559                                            | 0.0634                                             |
| wR(F <sup>2</sup> )                                        | 0.1098                                           | 0.0871                                                        | 0.1027                                            | 0.0737                                         | 0.1437                                         | 0.1562                                         | 0.1382                                         | 0.1794                                            | 0.19                                               |
| Goof                                                       | 1.081                                            | 1.092                                                         | 1.059                                             | 1.058                                          | 1.035                                          | 0.928                                          | 1.03                                           | 0.935                                             | 0.958                                              |
| Δρ <sub>max</sub> , Δρ <sub>min</sub> (e Å <sup>-3</sup> ) | 0.403, -0.274                                    | 0.345, -0.204                                                 | 0.314, -0.336                                     | 0.159, -0.147                                  | 0.26, -0.278                                   | 0.267, -0.286                                  | 0.227, -0.262                                  | 0.312, -0.321                                     | 0.499, -0.521                                      |

## 2 Solubility Measurements

**pF-pABA in water.** Using gravimetric analysis, the solubilities of the pF-pABA and 2F-pABA samples were determined between 5<sup>o</sup> and 40<sup>o</sup>C in aqueous solutions. Saturated solutions of the pure solids were prepared in a 100mL parafilm insulated jacketed vessel. The temperature of the vessel was controlled using a water bath and the saturated solutions of each compound were constantly stirred at 300rpm for a period of 24h to allow for equilibration. After stirring, the excess undissolved solute was left to settle for 1h without agitation. 4ml samples of the saturated solutions were taken using a 5ml syringe and filtered using a 0.22 $\mu$ m membrane filter to remove smaller undissolved solute. The remaining solution was transferred into 5 sample vials of known weight. The samples and vials were weighed and allowed to evaporate at 55<sup>o</sup>C in a drying oven. The masses of the residues were then calculated. The mean solubility values at each temperature were calculated using a mass balance and are given below:

| Solubility $\pm$ Standard Deviation (g/kg water)* |                    |                    |                    |                    |
|---------------------------------------------------|--------------------|--------------------|--------------------|--------------------|
| Molecule                                          | 5 $^{\circ}$ C     | 10 $^{\circ}$ C    | 25 $^{\circ}$ C    | 40 $^{\circ}$ C    |
| 2-F-pABA                                          | 0.464 $\pm$ 0.093  | 0.700 $\pm$ 0.031  | 1.261 $\pm$ 0.089  | 1.453 $\pm$ 0.073  |
| 2,3,4,5-tetraF-pABA                               | 7.641 $\pm$ 0.640  | 7.872 $\pm$ 0.330  | 13.440 $\pm$ 0.336 | 23.260 $\pm$ 0.083 |
| 2-Cl-pABA                                         | 0.1004 $\pm$ 0.037 | 0.2325 $\pm$ 0.035 | 0.3141 $\pm$ 0.091 | 1.0104 $\pm$ 0.078 |
| 3-Cl-pABA                                         | 0.5236 $\pm$ 0.631 | 0.2165 $\pm$ 0.067 | 0.5843 $\pm$ 0.595 | 0.7206 $\pm$ 0.126 |

\* Five measurements

### **pABA in water at various pHs.**

Solubilities ( $\alpha$  form) were measured as a function of pH (1.5 – 6.5) at 10 and 25<sup>o</sup>C. Saturated solutions were prepared by the addition of excess pABA (the calculated ideal values acted as a guide) to a stoppered 50ml flask containing 30 ml of water and fitted with a stirring bar. Known volumes of HCl or NaOH were added in small increments to alter the pH to a desired value. If visual observation indicated the presence of excess solids, the solution was allowed to stir for at least 3 hours in order to reach equilibrium.

pH was measured using a Mettler Toledo AG8603 pH meter ( $\pm 0.01$ ). 1 mL samples (five repeats) of these saturated pABA solutions were subjected to gravimetric analysis by evaporating to dryness at 65°C. From the measured mass of residue and the known volumes of water and acid or base solution added, compositions of saturated solutions in  $\text{ML}^{-1}$  were calculated.

| 25°C |                                   | 10°C |                                   |
|------|-----------------------------------|------|-----------------------------------|
| pH   | Concentration mol L <sup>-1</sup> | pH   | Concentration mol L <sup>-1</sup> |
| 0.77 | 0.675                             | 1.25 | 0.622                             |
| 1    | 0.788                             | 1.67 | 0.288                             |
| 1.5  | 0.473                             | 1.87 | 0.136                             |
| 1.85 | 0.2                               | 2.51 | 0.098                             |
| 2.46 | 0.071                             | 3.8  | 0.029                             |
| 3.8  | 0.035                             | 5.01 | 0.097                             |
| 4.85 | 0.054                             | 5.65 | 0.201                             |
| 5.72 | 0.197                             | 6.3  | 0.789                             |
| 6.16 | 0.716                             |      |                                   |

### 3 Computational methods

#### 3.1 Crystal structure prediction (CSP)

CSP calculations for all systems ((1) pABA ((a)  $Z'=1$ , (b)  $Z'=2$ ), (2) water, (3) pABA:water 1:1 ratio, (4) pABA:water 1:2 ratio) were carried out using the code CrystalPredictor (version 2.4.3). Flexibility was determined using gas phase finite difference perturbations around degrees of freedom indicated as potentially flexible by second derivatives at the gas phase minimum; this meant the carboxylic acid group torsion. The level of theory used was B3LYP, with the Aug-CC-pVTZ basis set, in Gaussian 09. A uniform local approximate model (LAM) grid was set up with LAMs evaluated at 0.0 and 180.0 degrees; a pass of the adaptive LAM algorithm indicated that this was sufficient to accurately describe the flexibility within the molecules. The potential parameters for C, H-C (hydrogen attached to carbon), N, O, and H-n (hydrogen attached to a polar atom) from the work of Williams and co-workers were used to describe the exchange-repulsion and dispersion interactions. The structure

generation stage sampled the 59 most common space groups. 500k and 1 million structural minimisations were run for the  $Z' = 1$  (1a, 2, 3, 4 and 5) and 2 (1b) searches respectively. After the CrystalPredictor calculations were completed a final clustering of generated structures was carried out with the COMPACK algorithm.

### 3.2 Refinement of Lattice energies

In order to refine the calculated lattice energies, the generated structures were minimised with an improved energy model for electrostatics consisting of atomic multipoles, with extended flexibility (amine hydrogen angles, and all angles within the carboxylic acid group), together with the same FIT potential, using CrystalOptimizer. The same level of theory (B3LYP/ Aug-CC-pVTZ ) was employed

### 3.3 Improved lattice energies: TPSS-D3

As a final step the lattice energies of the experimental form of *p*ABA (alpha) and ice (hexagonal) and the five lowest energy structures from investigations 3 and 4 were recomputed with periodic density functional theory with van der Waals corrections. For this, the TPSS functional was used, with Grimme's D3 vdW corrections, as implemented in the VASP code (version 5.4). An energy cut off of 1000 eV was used for the plane waves. The Brillouin zone was sampled using a Gamma centred Monkhorst-Pack approximation at k-point grids separated by approximately  $0.025 \cdot 2\pi \text{ \AA}^{-1}$ . Crystal structures were relaxed with this model allowing the unit cell volume as well as the atomic positions to optimise. Structural relaxations were halted when the calculated force on every atom was less than  $0.01 \text{ eV \AA}^{-1}$ .

## 4 Computational Results

Sections 4.1 – 4.3 summarise the results of CSP of water and *p*ABA 1:1 and 1:2 hydrates. Tables 4.1 and 4.2 provide the calculated lattice energies of the *p*ABA polymorphs<sup>3</sup>,  $\alpha$  and  $\beta$  and the free energies of hydrate formation of the most stable predicted hydrates.

### 4.1 CSP investigation of water.

The alcohol OH FIT potential used for water hydrogens<sup>1</sup>, as has been used in previous studies<sup>2</sup>.

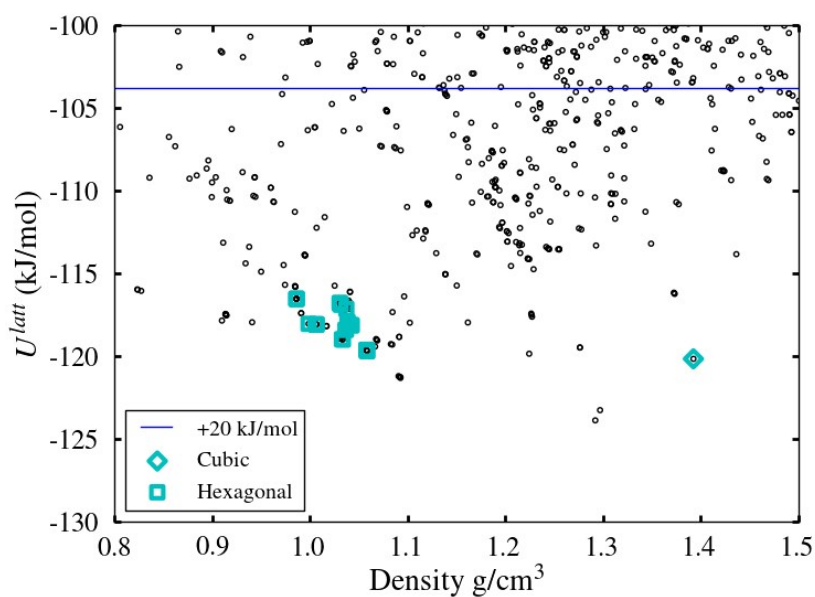

**Figure 4.1 Polymorphic landscape for water, following refinement.**

Several static proton fixed structures match with the disordered experimental hexagonal ice structure, consistent with an approximation of said disorder. The structures are significantly denser than experiment, consistent with previous investigations showing collapse of structure when disorder is ignored<sup>2</sup>.

#### 4.2 CSP investigation of *p*ABA:water 1:1 ratio.

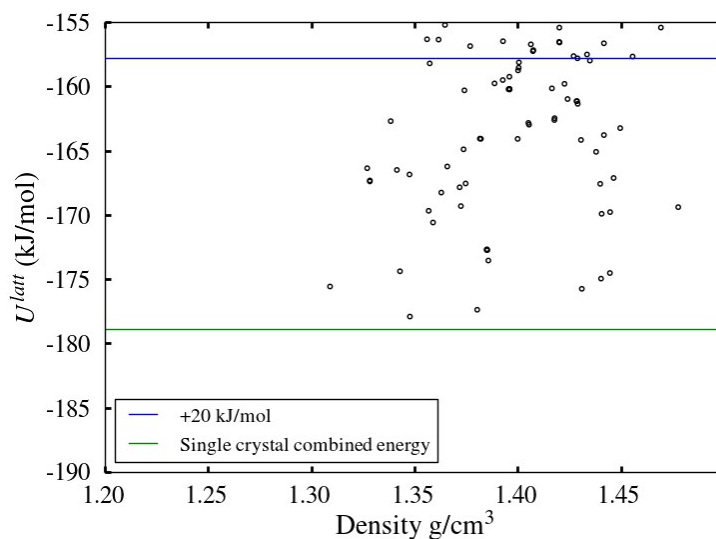

**Figure 4.2 1:1 *p*ABA:hydrate polymorphic landscape. Green line is the sum of the lowest energy of neat water and the lattice energy of  $\beta$  *p*ABA (AMBNAC08). Blue line is +20 kJ/mol from the global minimum. Energies are reported as per mole of asymmetric unit.**

### 4.3 CSP investigation *p*ABA:water 1:2 ratio.

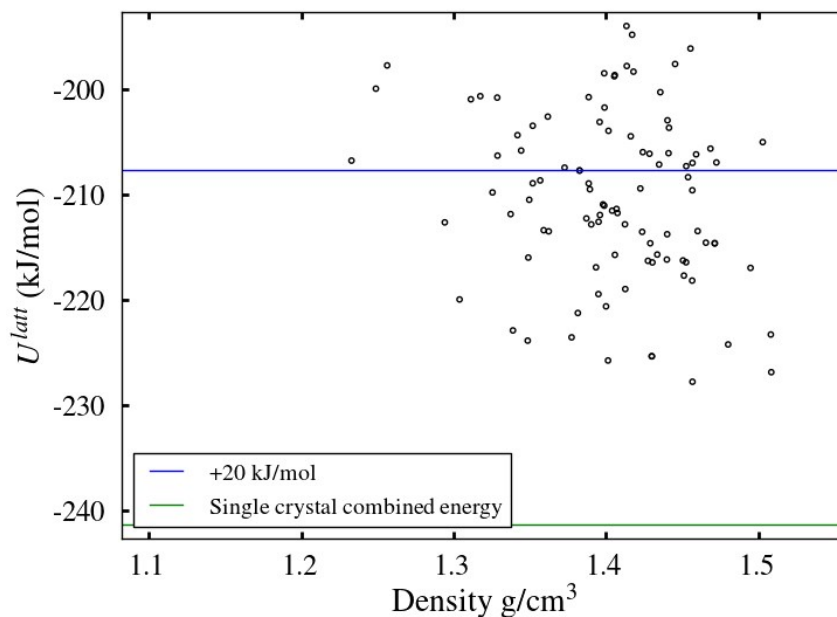

**Figure 4.3.** 1:2 *p*ABA:hydrate polymorphic landscape. Green line is the sum of twice the lowest energy of neat water and the lattice energy of  $\beta$  *p*ABA (AMBNAC08). Blue line is +20 kJ/mol from the global minimum. Energies are reported as per mole of asymmetric unit.

### 4.4 Improved lattice energies: TPSS-D3

The results presented in the previous sections indicate that there is no thermodynamic driving force for the formation of hydrates, in that the lowest lattice energy hydrate structures are higher in energy than the sum of the independent molecular component's (ice and *p*ABA) lowest energy crystal structure. However, given the approximations inherent in the computational method, particularly in the case of water, it was decided to perform full wavefunction calculations for the lowest 5 hydrate structures from each investigation, and compare the predicted lattice energies to the neat crystal structures at the same level of theory. Energies are reported per mole of molecules in the asymmetric unit.

The free energy of hydrate formation was calculated using the following equation<sup>4</sup>:

$$\Delta G_{hydrate\ formation} \approx \Delta E_{latt-gain}^{Hydrate} + 0.6$$

where by  $\Delta E_{latt-gain}^{Hydrate}$  is the difference in lattice energy between the predicted hydrate minus the lattice energy of  $\alpha$  *p*ABA minus the lattice energy of ice times the appropriate stoichiometry

(being either 1 for monohydrate or 2 for dihydrate). This confirms that none of the structures are expected to appear experimentally since all are less stable than the pure components.

|                       | RMSD <sub>15</sub> (Å) | U <sub>latt</sub> (kJ/mol) |
|-----------------------|------------------------|----------------------------|
| $\alpha$ <i>p</i> ABA | 0.072                  | -131.1                     |
| Hexagonal ice         | 0.132                  | -69.7                      |

**Table 4.1 Lattice Energies (VASP) for Hexagonal Ice and  $\alpha$  *p*ABA.**

| System                            | U <sub>latt</sub> (kJ/mol) | $\Delta G_{hydrate\ formation} \left(\frac{kJ}{mol}\right)$ |
|-----------------------------------|----------------------------|-------------------------------------------------------------|
| <i>p</i> ABA: hydrate 1:1, rank 1 | -187.7                     | 13.7                                                        |
| <i>p</i> ABA: hydrate 1:1, rank 2 | -194.1                     | 7.3                                                         |
| <i>p</i> ABA: hydrate 1:1, rank 3 | -188.5                     | 12.9                                                        |
| <i>p</i> ABA: hydrate 1:1, rank 4 | -186.4                     | 15.0                                                        |
| <i>p</i> ABA: hydrate 1:1, rank 5 | -186.9                     | 14.5                                                        |
| <i>p</i> ABA: hydrate 1:2, rank 1 | -221.1                     | 50                                                          |
| <i>p</i> ABA: hydrate 1:2, rank 2 | -18.1                      | 253                                                         |
| <i>p</i> ABA: hydrate 1:2, rank 3 | -252.3                     | 18.8                                                        |
| <i>p</i> ABA: hydrate 1:2, rank 4 | -251.8                     | 19.3                                                        |
| <i>p</i> ABA: hydrate 1:2, rank 5 | -256.0                     | 15.1                                                        |

**Table 4.2 Lattice Energies and Free Energies of Hydrate Formation for most stable predicted *p*ABA hydrates.**



## References

- 1 S. R. Cox, L. -Y Hsu and D. E. Williams, *Acta Crystallogr. Sect. A*, 1981, **37**, 293–301.
- 2 A. T. Hulme and S. L. Price, *J. Chem. Theory Comput.*, 2007, **3**, 1597–1608.
- 3 A. J. Cruz-Cabeza, R. J. Davey, I. D. H. Oswald, M. R. Ward and I. J. Sugden, *CrystEngComm*, 2019, **21**, 2034-2042.
- 4 A. J. Cruz-Cabeza, S. E. Wright and A. Bacchi, *Chem. Commun.*, 2020 5127-5130.
